# Supplementary material
Source: Springer Nature journal article supplement (https://www.springermedizin.de/resource/supplementary/12958_2010_953_MOESM6_ESM.pdf/9568878)

Relative lumican mRNA levels  
(fold)

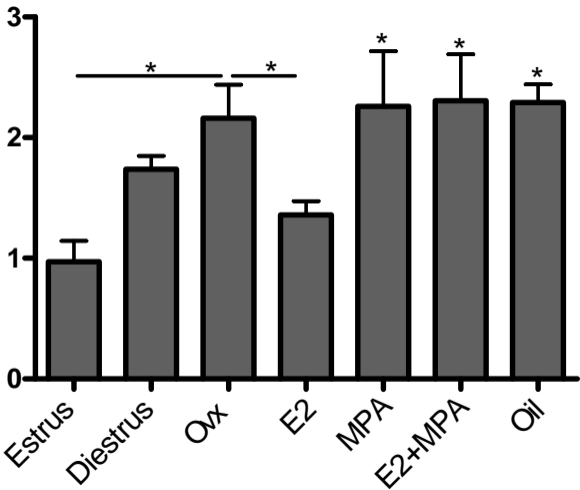

Supplement: MOESM6 [file 9568878]
